# Supplementary material for: Tumor-Associated Macrophages Induce Migration of Renal Cell Carcinoma Cells via Activation of the CCL20-CCR6 Axis
Source: MDPI journal article supplement (doi:10.3390/cancers12010089), 2019-12-30
Supplement: s1 [file s1]

# Supplementary Materials: Tumor-associated macrophages induce migration of renal cell carcinoma cells via activation of the CCL20-CCR6 axis

Suguru Kadomoto, Kouji Izumi, Kaoru Hiratsuka, Taito Nakano, Renato Naito, Tomoyuki Makino, Hiroaki Iwamoto, Hiroshi Yaegashi, Kazuyoshi Shigehara, Yoshifumi Kadono, Hiroki Nakata, Yohei Saito, Kyoko Nakagawa-Goto, and Atsushi Mizokami

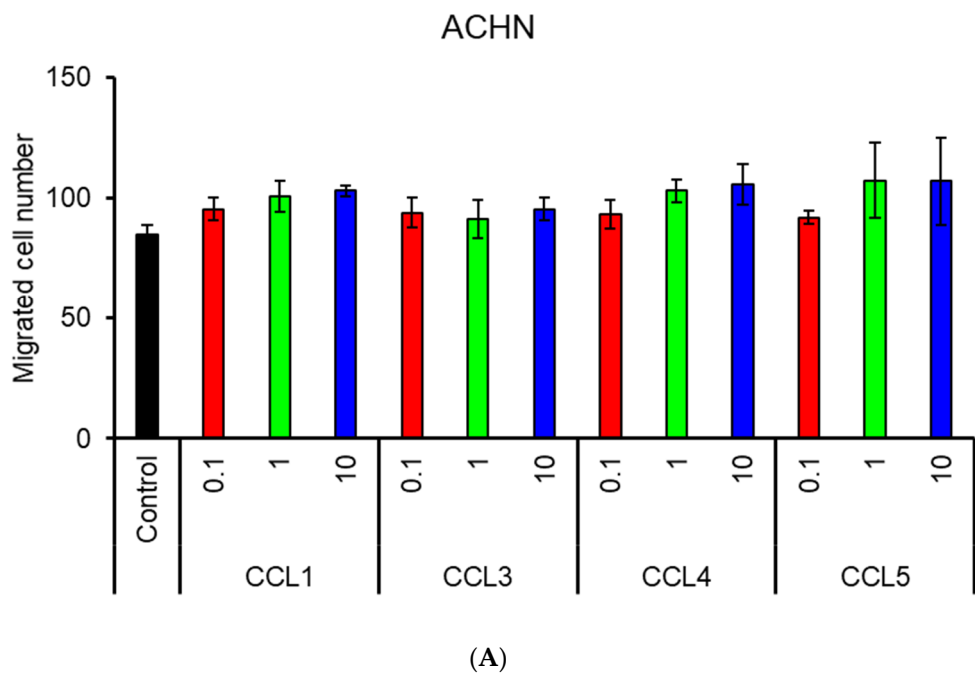

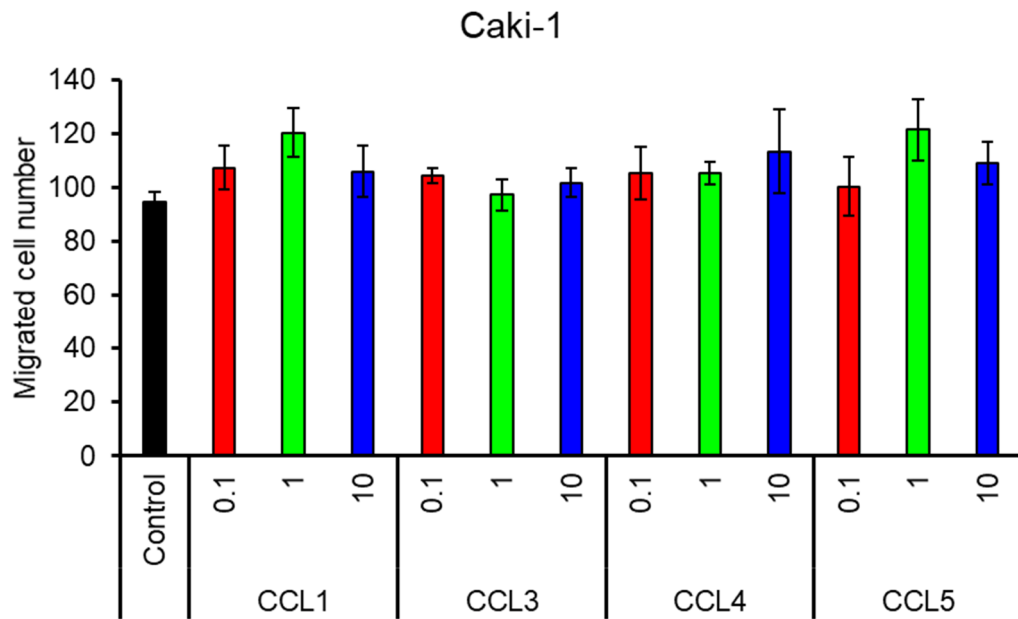

**(B)**

**Figure S1.** The migration of ACHN (A) and Caki-1 (B) treated with four potential chemokines. migration was not induced by any chemokines. Recombinant human CCL1 (272-I), CCL3 (270-LD), CCL4 (8228-MB), and CCL5 (278-RN) were purchased from R&D Systems (Minneapolis, MN, USA).

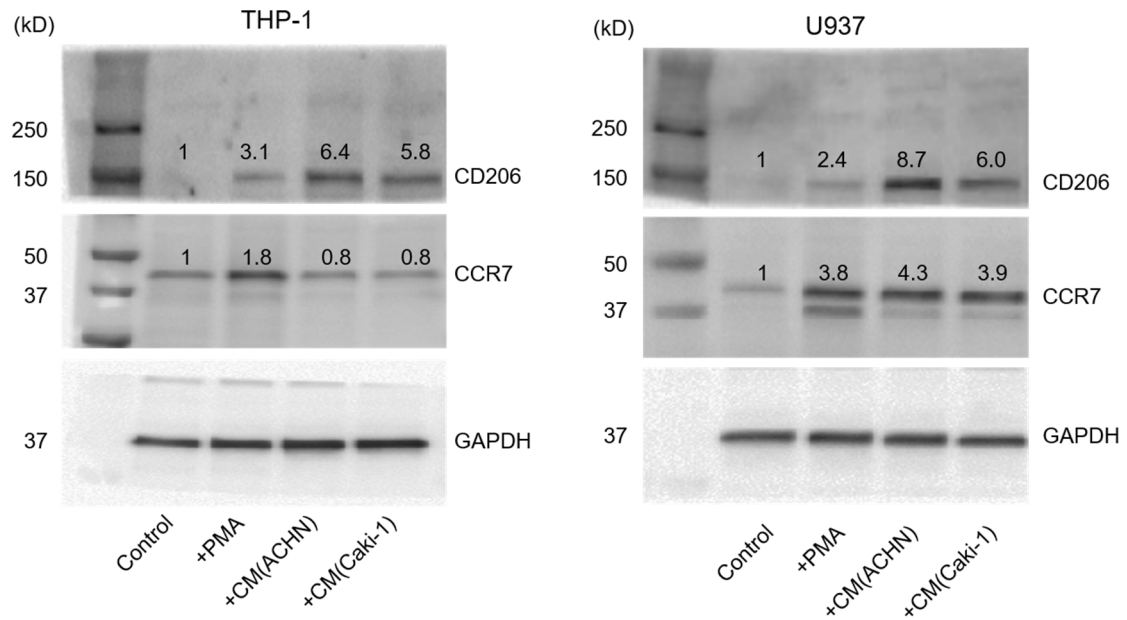

**Figure S2.** Full blot of Figure 1A.

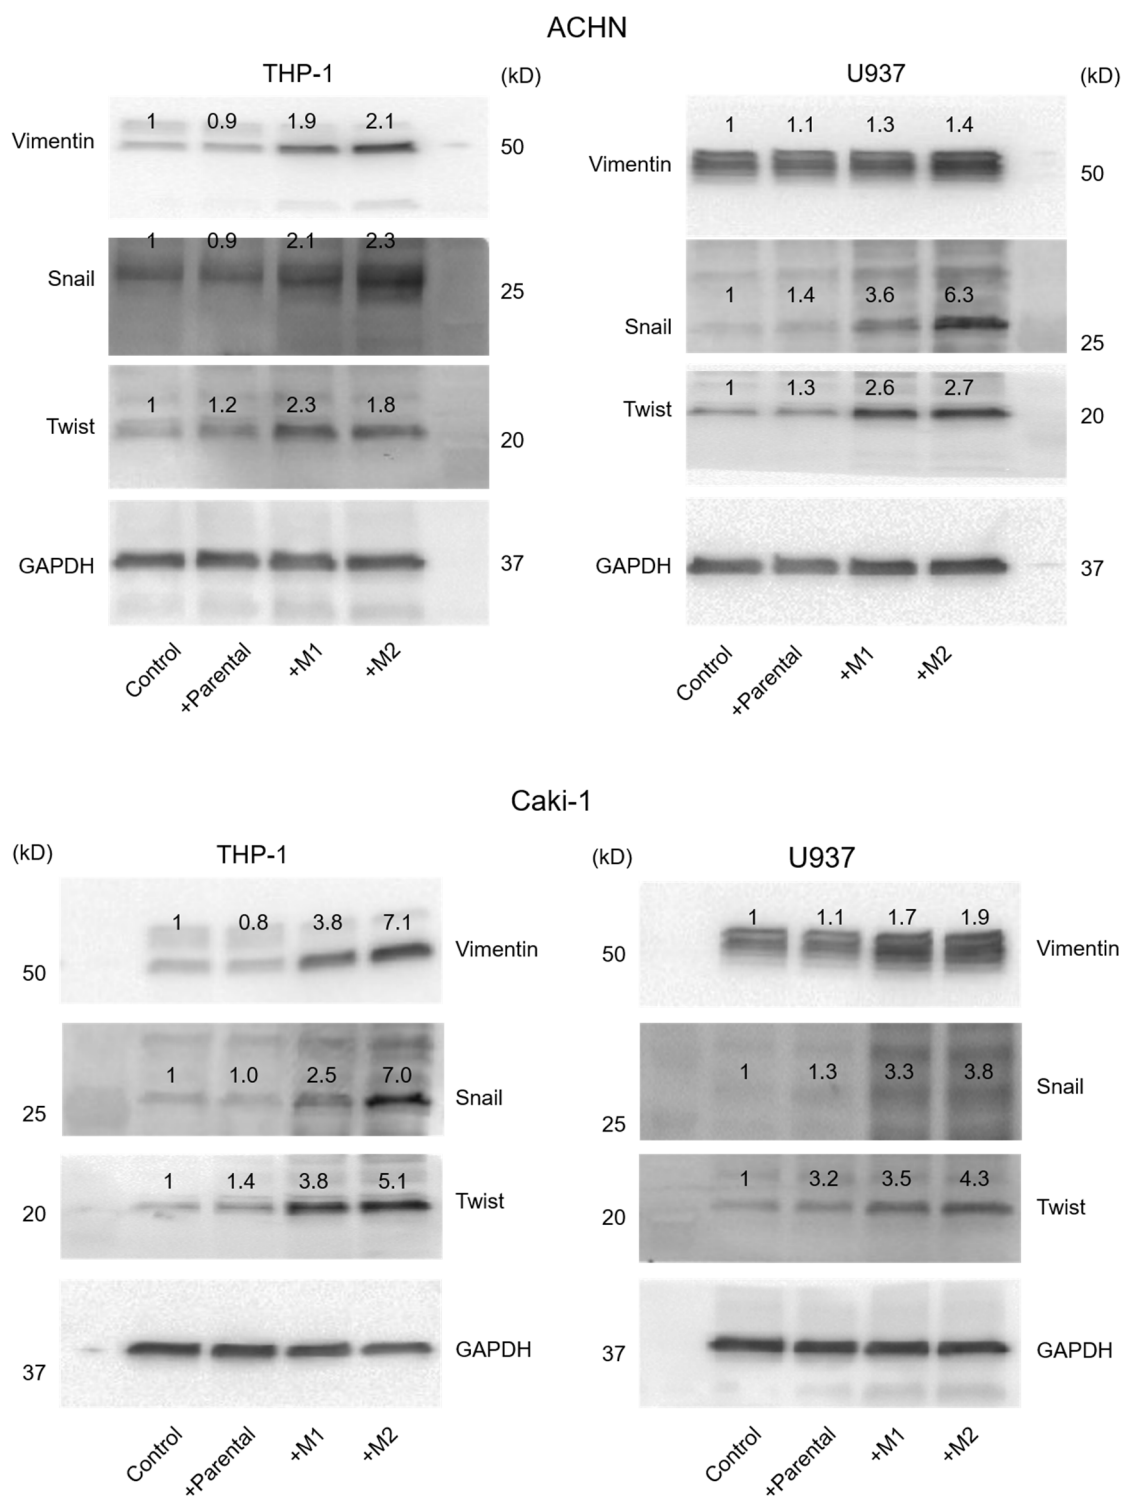

**Figure S3.** Full blot of Figure 2B.

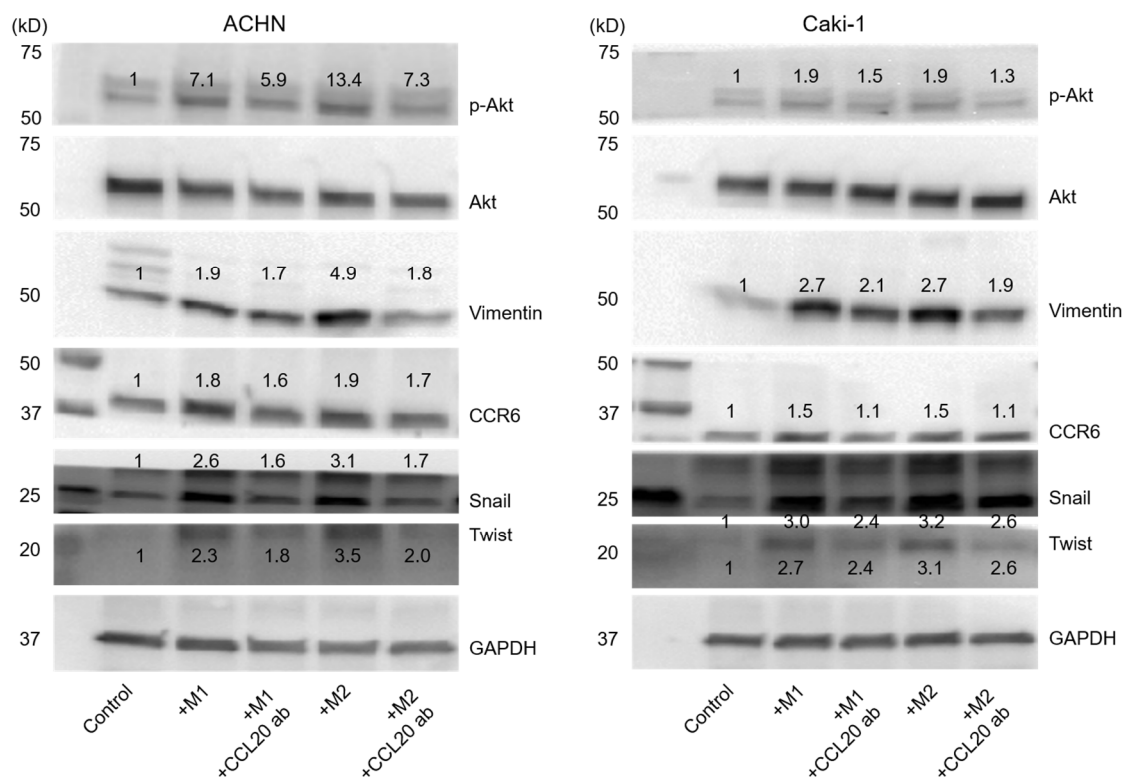

**Figure S4.** Full blot of Figure 5A.

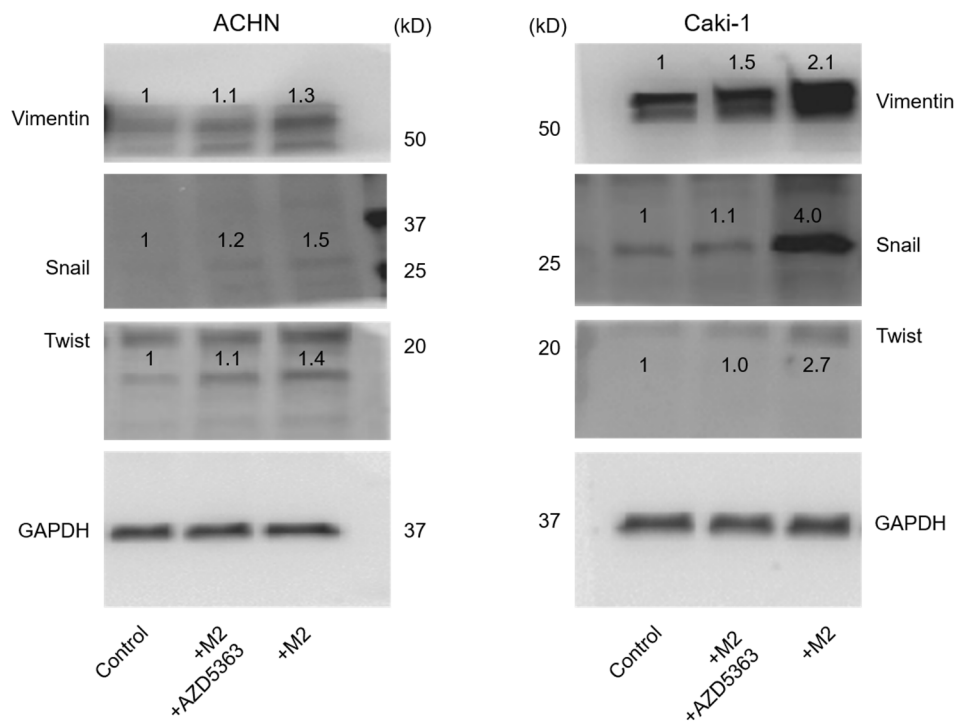

**Figure S5.** Full blot of Figure 5B.
